# Supplementary material for: Superficial acral fibromyxoma: insights from case management and comprehensive literature review
Source: PubMed Central journal article supplement — EFORT Open Rev. 2024 Feb 1;9(2):129–37. doi: 10.1530/EOR-23-0151 (PMC10873247; doi:10.1530/eor-23-0151), 2024-02-01
Supplement: EOR-23-0151supplementary_table_1.pdf [file EOR-23-0151supplementary_table_1.pdf]

**Supplementary Table 1.** Summary of the reported literatures on superficial acral fibromyoma.

|                                          | Cases | Age (No. of cases)                                                                                                  | Gender (No. of cases) | Geographic detail   | Location (No. of cases)             | Trauma prior  | Recur                                                                                           | Immunoreactivity                                                                                                                                                                                                                      | Treatment                       |
|------------------------------------------|-------|---------------------------------------------------------------------------------------------------------------------|-----------------------|---------------------|-------------------------------------|---------------|-------------------------------------------------------------------------------------------------|---------------------------------------------------------------------------------------------------------------------------------------------------------------------------------------------------------------------------------------|---------------------------------|
| <b>Fetsch et al. 2001<sup>[1]</sup></b>  | 37    | 10-19 (1)<br>20-29 (6)<br>30-39 (5)<br>40-49 (13)<br>50-59 (8)<br>60-69 (1)<br>70-79 (2)<br><br>One unspecified age | M - 25<br>F - 12      | Washington, USA     | Finger - 13<br>Toe - 20<br>Hand - 4 | None          | 2 / 37<br><br>(1 <sup>st</sup> case – 2 years 10 months<br><br>2 <sup>nd</sup> case – 10 years) | <b>Available for 27 Tumours:</b><br><br>CD 34 - positive in 21 / 23<br><br>Epithelial membrane antigen – positive in 18/25<br><br>CD 99 11/13<br><br>S100 - 1 (weak)/23<br><br>Actin, desmin, glial acidic protein, HMB-45 - negative | Excision - 33<br>Amputation - 4 |
| <b>Kazakov et al 2002<sup>[2]</sup></b>  | 2     | 51 (1)<br>75 (1)                                                                                                    | M - 1<br>F - 1        | Zurich, Switzerland | Toe - 2                             | Not mentioned | No recurrence by 8 months – 1 case<br><br>2nd case, not mentioned                               | CD34 - positive<br><br>EMA - positive in 1 and negative in 1 case<br><br>S100, alpha smooth muscle actin - negative                                                                                                                   | Excision - 2                    |
| <b>Meyerle et al. 2004<sup>[3]</sup></b> | 1     | 53 (1)                                                                                                              | M - 1                 | Washington, USA     | Finger                              | None          | None at 6 months                                                                                | CD 34, CD99, epithelial membrane antigen and vimentin - positive<br><br>Actin, desmin, S-100, cytokeratin and HMB-45 - negative                                                                                                       | Excision - 1                    |
| <b>Andre et al. 2004<sup>[4]</sup></b>   | 1     | 50 (1)                                                                                                              | F - 1                 | Brussels, Belgium   | Toe                                 | Not mentioned | None at 1 year                                                                                  | CD34 - positive<br><br>EMA, S100, actin, desmin, keratin, CD99 - negative                                                                                                                                                             | Excision - 1                    |

|                                             | Cases | Age (No. of cases)                      | Gender (No. of cases) | Geographic detail           | Location (No. of cases)           | Trauma prior                           | Recur             | Immunoreactivity                                                                                                                                                                       | Treatment    |
|---------------------------------------------|-------|-----------------------------------------|-----------------------|-----------------------------|-----------------------------------|----------------------------------------|-------------------|----------------------------------------------------------------------------------------------------------------------------------------------------------------------------------------|--------------|
| <b>Quaba et al. 2005<sup>[5]</sup></b>      | 1     | 71 (1)                                  | M - 1                 | Dundee, UK                  | Finger                            | Yes                                    | None at 15 months | Vimentin and CD 34 - positive<br>S100, CD57, EMA - negative                                                                                                                            | Excision - 1 |
| <b>Abou-Nukta et al. 2006<sup>[6]</sup></b> | 1     | 33 (1)                                  | M - 1                 | Connecticut, New Haven, USA | Finger                            | History of trauma and fungal infection | Not mentioned     | CD34 - positive                                                                                                                                                                        | Excision - 1 |
| <b>Tardio JC et al. 2008<sup>[7]</sup></b>  | 4     | 35-52<br>*Unspecified age for each case | M - 1<br>F - 3        | Madrid, Spain               | Finger - 2<br>Hand - 1<br>Toe - 1 | None                                   | Not mentioned     | <b>1 Case:</b><br>CD 34 - positive<br><br>CD99, CD10 - negative<br><br><b>3 case:</b><br>CD 34, CD 99, CD10 - positive<br><br>EMA, S100, SMA, muscle-specific actin, desmin - negative | Excision - 4 |
| <b>Misago et al. 2008<sup>[8]</sup></b>     | 1     | 53 (1)                                  | M - 1                 | Saga, Japan                 | Toe                               | Not mentioned                          | None at 1 year    | CD34, CD99, CD10, Vimentin - positive<br><br>S100, EMA - negative                                                                                                                      | Excision - 1 |

|                                                                               | Cases | Age (No. of cases)                                                                                                | Gender (No. of cases) | Geographic detail | Location (No. of cases)             | Trauma prior | Recur             | Immunoreactivity                                                                                                                                                              | Treatment                      |
|-------------------------------------------------------------------------------|-------|-------------------------------------------------------------------------------------------------------------------|-----------------------|-------------------|-------------------------------------|--------------|-------------------|-------------------------------------------------------------------------------------------------------------------------------------------------------------------------------|--------------------------------|
| <b>Prescott et al. 2008<sup>[9]</sup></b><br><b>RETROSPECTIVE 1970 - 2006</b> | 41    | 10-19 (1)<br>20-29 (6)<br>30-39 (6)<br>40-49 (9)<br>50-59 (4)<br>60-69 (8)<br>70-79 (5)<br>80-89 (1)<br>90-99 (1) | M - 27<br>F - 14      | UK                | Finger - 11<br>Toe - 29<br>Hand - 1 | 2/41         | 5/12              | CD34 Vemintin - positive in 41/41 cases<br><br>CD99 12/15 positive<br><br>EMA 31/33 positive<br><br>S100, HMB45, keratin, desmin, SMA - negative in 41/41                     | Excision - 41                  |
| <b>Varikatt et al. 2008<sup>[10]</sup></b>                                    | 2     | 32 (1)<br>56 (1)                                                                                                  | M - 2                 | Sydney, Australia | Finger - 2                          | None - 2     | Not mentioned     | CD 34, vimentin - positive<br><br>Cytokeratins AE1/3, cam 5.2, EMA, actin, desmin, S100 - negative                                                                            | Excision - 1<br>Amputation - 1 |
| <b>Oteo-Alvaro et al. 2008<sup>[11]</sup></b>                                 | 1     | 35 (1)                                                                                                            | M - 1                 | Madrid, Spain     | Toe                                 | None         | None at 2 years   | CD 34, CD 99, vimentin - positive<br><br>S100, actin, calponin, caldesmon, collagen IV, CD 31, bel-2, desmin, cytokeratins, EMA - negative                                    | Excision - 1                   |
| <b>Al-Daraji et al. 2008<sup>[12]</sup></b>                                   | 32    | 20-29 (4)<br>30-39 (4)<br>40-49 (7)<br>50-59 (6)<br>60-69 (6)<br>70-79 (3)<br>80-89 (2)                           | M - 22<br>F - 10      | Nottingham, UK    | Finger - 13<br>Toe - 15<br>Heel - 4 | none         | 3 / 32 by 4 years | CD34 - positive 30/32 cases<br><br>Vimentin positive 30/30<br><br>EMA - positive 17/31 cases<br><br>CD99 - positive 7/8 cases<br><br>S100, HMB45, keratin, SMA - all negative | Excision - 32                  |

|                                                 | Cases | Age (No. of cases)         | Gender (No. of cases) | Geographic detail | Location (No. of cases)    | Trauma prior  | Recur                                                              | Immunoreactivity                                                                                                                                                                  | Treatment                       |
|-------------------------------------------------|-------|----------------------------|-----------------------|-------------------|----------------------------|---------------|--------------------------------------------------------------------|-----------------------------------------------------------------------------------------------------------------------------------------------------------------------------------|---------------------------------|
| <b>Luzar et al. 2009<sup>[13]</sup></b>         | 14    | Mean age - 52              | M - 9<br>F - 5        | London, UK        | Toe - 8<br>Unspecified - 6 | None          | No recurrence at 18.5 months                                       | CD34 - positive 14/14<br><br>EMA, S100, cytokeratin, desmin - negative                                                                                                            | Excision - 13<br>Amputation - 1 |
| <b>Wang et al. 2009<sup>[14]</sup></b>          | 1     | 62 (1)                     | M - 1                 | Wuxi, China       | Finger                     | Not mentioned | Not mentioned                                                      | CD34, CD99, Vimentin, CD10 - positive<br><br>Actin, desmin, EMA - negative                                                                                                        | Excision - 1                    |
| <b>Pasquinelli et al. 2009<sup>[15]</sup></b>   | 1     | 35 (1)                     | M - 1                 | Rome, Italy       | Toe                        | Not mentioned | None at 1 year                                                     | CD 44, vimentin - positive<br><br>CD 34, EMA, CD 99, CD10 - negative                                                                                                              | Excision - 1                    |
| <b>Chattopadhyay et al. 2010<sup>[16]</sup></b> | 1     | 40 (1)                     | M - 1                 | London, UK        | Toe                        | None          | Not mentioned                                                      | CD34, vimentin - positive<br><br>S100, SMA, Fac XIIIa - negative                                                                                                                  | Excision - 1                    |
| <b>Cogrel et al. 2010<sup>[17]</sup></b>        | 3     | 32 (1)<br>41 (1)<br>72 (1) | M - 1<br>F - 2        | Pessac, France    | Finger- 1<br>Toe - 2       | None          | None at 9 months<br><br>None at 12 months<br><br>None at 22 months | CD34 - positive for all 3 cases<br><br>EMA - weak and focal positive in 1 case<br><br>EMA, CD 99, actin, caldesmone, S100, anti-pancytokeratin antibody, HMB-45, A 103 - negative | Excision - 3                    |

|                                                     | Cases                 | Age (No. of cases) | Gender (No. of cases) | Geographic detail | Location (No. of cases) | Trauma prior  | Recur               | Immunoreactivity                                                     | Treatment     |
|-----------------------------------------------------|-----------------------|--------------------|-----------------------|-------------------|-------------------------|---------------|---------------------|----------------------------------------------------------------------|---------------|
| <b>Goo et al. 2010</b> <sup>[18]</sup>              | 1                     | 15 (1)             | F - 1                 | Wonju, Korea      | Finger                  | None          | Yes after 20 months | CD34, EMA, Vimentin - positive<br><br>Actin, desmin, S100 - negative | Excision - 1  |
| <b>Ashby-Richardson et al. 2011</b> <sup>[19]</sup> | <b>Overview study</b> |                    |                       |                   |                         |               |                     |                                                                      |               |
| <b>Fanti et al. 2011</b> <sup>[20]</sup>            | 12                    | 28-76<br>Mean 51   | M - 8<br>F - 4        | Bologna, Italy    | Not mentioned<br>12     | Not mentioned | None at 5 years     | CD34, EMA, CD99 - positive<br><br>S100, HMB45 - negative             | Excision - 12 |
| <b>Messeguer et al. 2012</b> <sup>[21]</sup>        | 1                     | 40 (1)             | Not Specified         | Valencia, Spain   | Finger                  | Not mentioned | Not mentioned       | CD 34, CD 99 - positive<br><br>EMA, S100 - negative                  | Excision - 1  |
| <b>Ben Brahim et al. 2012</b> <sup>[22]</sup>       | 1                     | 32 (1)             | Male                  | Nibeul, Tunisie   | Toe                     | Not mentioned | None at 18 months   | CD10, CD99 - positive<br><br>CD34, EMA - negative                    | Excision - 1  |
| <b>Bindra et al, 2012</b> <sup>[23]</sup>           | 1                     | 47(1)              | Female                | California, USA   | Thumb                   | No            | Not mentioned       | Not mentioned                                                        | Excision - 1  |

|                                                                                           | Cases | Age (No. of cases)         | Gender (No. of cases) | Geographic detail       | Location (No. of cases)                                                                     | Trauma prior  | Recur            | Immunoreactivity                                                        | Treatment                                      |
|-------------------------------------------------------------------------------------------|-------|----------------------------|-----------------------|-------------------------|---------------------------------------------------------------------------------------------|---------------|------------------|-------------------------------------------------------------------------|------------------------------------------------|
| <b>Hollman et al. 2012<sup>[24]</sup></b><br><b>RETROSPECTIVE</b><br><b>(1997 - 2009)</b> | 124   | *Age unspecified           | M - 70<br>F - 54      | Boston, USA             | Finger - 60<br>Hand - 4<br>Toe - 46<br>Foot - 10<br>Thigh - 1<br>Leg - 1<br>Unspecified - 2 | 14 / 55       | 10 / 47 recurred | 42 / 61                                                                 | Biopsy - 74<br>Excision - 47<br>Amputation - 3 |
| <b>Hwang et al. 2013<sup>[25]</sup></b>                                                   | 1     | 54 (1)                     | M - 1                 | Busan, Korea            | Toe                                                                                         | Not mentioned | None at 1 year   | CD34 positive<br>desmin, S100, EMA - neg                                | Excision - 1                                   |
| <b>Wei et al. 2013<sup>[26]</sup></b>                                                     | 1     | 44 (1)                     | M - 1                 | New Jersey, Newark, USA | Thumb                                                                                       | None          | Not mentioned    | Not mentioned                                                           | Excision - 1                                   |
| <b>Kwok et al. 2013<sup>[27]</sup></b>                                                    | 1     | 57 (1)                     | F - 1                 | Leeds, UK               | Toe                                                                                         | None          | Not mentioned    | CD 34 - positive<br>S100, Melan A, desmin, actin, EMA- negative         | Not mentioned                                  |
| <b>Chabbab et al. 2013<sup>[28]</sup></b>                                                 | 3     | 40 (1)<br>50 (1)<br>63 (1) | F - 1<br>M - 1        | Casablanca, Morocco     | Finger -2<br>Toe -1                                                                         | None          | None at 1 year   | CD 34 - positive<br>CD 99, EMA, actin, AE1/AE3 keratin, S100 - negative | Excision - 3                                   |
| <b>Sinha et al. 2013<sup>[29]</sup></b>                                                   | 1     | 48 (1)                     | F -1                  | West Bengal, India      | Toe                                                                                         | Not mentioned | Not mentioned    | Not mentioned                                                           | Excision -1                                    |

|                                               | Cases                 | Age (No. of cases)         | Gender (No. of cases) | Geographic detail | Location (No. of cases) | Trauma prior  | Recur            | Immunoreactivity                                                      | Treatment                                            |
|-----------------------------------------------|-----------------------|----------------------------|-----------------------|-------------------|-------------------------|---------------|------------------|-----------------------------------------------------------------------|------------------------------------------------------|
| <b>Park et al. 2014</b> <sup>[30]</sup>       | 1                     | 58 (1)                     | F - 1                 | Seoul, Korea      | Hand                    | Not mentioned | None at 6 months | CD99- positive<br>CD 34 and EMA - negative                            | Excision - 1                                         |
| <b>Garcia et al. 2014</b> <sup>[31]</sup>     | 1                     | 43 (1)                     | F - 1                 | Sevilla, Spain    | Toe                     | None          | None at 2 years  | CD34 - positive<br>S100, EMA, AML - negative                          | Excision - 1                                         |
| <b>Porto et al. 2014</b> <sup>[32]</sup>      | 1                     | 75 (1)                     | F - 1                 | São Paulo, Brazil | Toe                     | None          | Not mentioned    | CD34, CD99 and EMA – positive<br>S100, Smooth muscle actin – negative | Excision - 1                                         |
| <b>Raghupathi et al. 2015</b> <sup>[33]</sup> | 1                     | 27 (1)                     | F - 1                 | Mysore, India     | Toe                     | Not mentioned | Not mentioned    | Not mentioned                                                         | Excision - 1                                         |
| <b>Schwager et al. 2015</b> <sup>[384]</sup>  | 3                     | 35 (1)<br>45 (1)<br>47 (1) | M - 2<br>F - 1        | Rhode Island, USA | Finger - 1<br>Toe - 2   | none          | None at 1 year   | CD34 - positive<br>S100, Factor XIIIa, neurofilament - negative       | Excision - 1<br>Shave biopsy - 1<br>Wedge biopsy - 1 |
| <b>Sawaya et al. 2015</b> <sup>[35]</sup>     | <b>Overview study</b> |                            |                       |                   |                         |               |                  |                                                                       |                                                      |

|                                              | Cases | Age (No. of cases) | Gender (No. of cases) | Geographic detail             | Location (No. of cases) | Trauma prior  | Recur            | Immunoreactivity                                                                                                                                  | Treatment                                                                           |
|----------------------------------------------|-------|--------------------|-----------------------|-------------------------------|-------------------------|---------------|------------------|---------------------------------------------------------------------------------------------------------------------------------------------------|-------------------------------------------------------------------------------------|
| <b>Carranza et al. 2015</b> <sup>[36]</sup>  | 1     | 53 (1)             | M - 1                 | Madrid, Spain                 | Toe                     | Not mentioned | None at 6 months | CD34, CD99, CD10, EMA - positive<br><br>Actin, desmin, cytokeratins, S100, MUC4, GFAP, CAM 5.2, HHF116, Claudie, neurofilaments, HMB45 - negative | Excision - 1                                                                        |
| <b>Hankinson et al. 2016</b> <sup>[37]</sup> | 1     | 56 (1)             | M - 1                 | Vermont, USA                  | Finger                  | none          | None at 3 months | not done                                                                                                                                          | Mohs surgery (wide excision – frozen section done for complete microscopic control) |
| <b>Ramya et al. 2016</b> <sup>[38]</sup>     | 1     | 20 (1)             | M - 1                 | Maharashtra, India            | Finger                  | none          | None at 2 years  | CD34, CD99 vimentin - positive                                                                                                                    | Excision - 1                                                                        |
| <b>DeFroda et al. 2016</b> <sup>[39]</sup>   | 1     | 33 (1)             | F - 1                 | Providence, Rhode Island, USA | Finger                  | Not mentioned | Not mentioned    | Not mentioend                                                                                                                                     | Excision – 1                                                                        |
| <b>Grigore et al. 2016</b> <sup>[40]</sup>   | 1     | 62 (1)             | F - 1                 | Cluj-Napoca, Romania          | Toe                     | Yes           | None at 1 year   | CD34, CD99, CD10 - positive<br><br>EMA - negative                                                                                                 | Excision – 1                                                                        |



|                                                 | Cases | Age (No. of cases)                                                         | Gender (No. of cases) | Geographic detail  | Location (No. of cases)                                         | Trauma prior  | Recur                           | Immunoreactivity                                                                                                    | Treatment         |
|-------------------------------------------------|-------|----------------------------------------------------------------------------|-----------------------|--------------------|-----------------------------------------------------------------|---------------|---------------------------------|---------------------------------------------------------------------------------------------------------------------|-------------------|
| <b>Sundaramurthy et al. 2016<sup>[41]</sup></b> | 1     | 31 (1)                                                                     | M - 1                 | Kanchipuram, India | Finger                                                          | None          | Not mentioned                   | CD34 - positive<br>S100 - negative                                                                                  | Excision - 1      |
| <b>Agaimy et al. 2017<sup>[42]</sup></b>        | 11    | 30-39 (4)<br>40-49 (2)<br>50-59 (2)<br>60-69 (0)<br>70-79 (1)<br>80-89 (2) | M - 7<br>F - 4        | Erlanger, Germany  | Finger - 5<br>Toe - 3<br>Heel - 1<br>leg - 1<br>Unspecified - 1 | Not mentioned | Nil at 7 - 60 months (10 cases) | CD34 - positive in 9/9<br>EMA - positive in 2/11<br>Rb1 IHC loss in 9/10 cases<br>S100, SMA, MUC4, STAT6 - negative | Excision - 11     |
| <b>Gupta et al. 2017<sup>[43]</sup></b>         | 1     | 37 (1)                                                                     | M - 1                 | Chandigarh, India  | Toe                                                             | None          | None at 2 years                 | CD34 - positive                                                                                                     | Wide excision - 1 |
| <b>Pinheiro et al. 2017<sup>[44]</sup></b>      | 1     | 71 (1)                                                                     | M - 1                 | Manaus, Brazil     | Toe                                                             | not mentioned | None at 6 months                | CD34 - positive<br>S100, desmina, CK 40,48, actin, mucin - negative                                                 | Excision - 1      |
| <b>Robati et al. 2017<sup>[45]</sup></b>        | 1     | 18 (1)                                                                     | F - 1                 | Tehran, Iran       | Toe                                                             | None          | None at 6 months                | Vimentin, CD99 - positive<br>CD34 - negative                                                                        | Excision - 1      |
| <b>Hashimoto et al. 2018<sup>[46]</sup></b>     | 1     | 37 (1)                                                                     | M - 1                 | Osaka, Japan       | Toe                                                             | None          | None at 2 years                 | CD 34 - positive<br>S100, actin, EMA, desmin - negative                                                             | Excision - 1      |

|                                               | Cases | Age (No. of cases) | Gender (No. of cases) | Geographic detail          | Location (No. of cases) | Trauma prior  | Recur            | Immunoreactivity                                                                                        | Treatment     |
|-----------------------------------------------|-------|--------------------|-----------------------|----------------------------|-------------------------|---------------|------------------|---------------------------------------------------------------------------------------------------------|---------------|
| <b>Moulonguet et al. 2019</b> <sup>[47]</sup> | 1     | 57(1)              | F – 1                 | Paris, France              | Toe                     | Not mentioned | Not mentioned    | CD34 -positive                                                                                          | Not mentioned |
| <b>Sood et al. 2019</b> <sup>[48]</sup>       | 1     | 38(1)              | M – 1                 | New Delhi, India           | Finger                  | Not mentioned | Not mentioned    | CD 34, CD10 and CD99 – positive<br>S100 – negative                                                      | Excision - 1  |
| <b>Wagner et al. 2019</b> <sup>[49]</sup>     | 1     | 41 (1)             | M – 1                 | Texas, USA                 | Toe                     | Yes           | Not mentioned    | CD 34, colloidal iron – positive                                                                        | Not mentioned |
| <b>Crestani et al 2020</b> <sup>[50]</sup>    | 1     | 58(1)              | F – 1                 | São Paulo, Brazil          | Finger                  | Not mentioned | Not mentioned    | CD34, Vimentin – positive<br>S100 – negative                                                            | Not mentioned |
| <b>Ho et al. 2021</b> <sup>[51]</sup>         | 1     | 48 (1)             | F -1                  | New South Wales, Australia | Finger                  | No            | Not mentioned    | CD 34, CD 99 – positive<br>EMA, smooth muscle actin, Sox10, desmin – negative<br>Loss of RB1 expression | Excision - 1  |
| <b>Debordes et al. 2023</b> <sup>[52]</sup>   | 1     | 64(1)              | M – 1                 | Strasbourg, France         | Toe                     | No            | None at 6 months | CD 34 – positive<br>Loss of RB1 expression                                                              | Excision - 1  |

|                                             | Cases      | Age (No. of cases)                                                                                                                               | Gender (No. of cases)                    | Geographic detail                                                                                                                    | Location (No. of cases)                                                                                                                                                         | Trauma prior                 | Recur                                                                 | Immunoreactivity                                                                                                                                                                                                      | Treatment                                                        |
|---------------------------------------------|------------|--------------------------------------------------------------------------------------------------------------------------------------------------|------------------------------------------|--------------------------------------------------------------------------------------------------------------------------------------|---------------------------------------------------------------------------------------------------------------------------------------------------------------------------------|------------------------------|-----------------------------------------------------------------------|-----------------------------------------------------------------------------------------------------------------------------------------------------------------------------------------------------------------------|------------------------------------------------------------------|
| <b>Rodríguez et al. 2023<sup>[53]</sup></b> | 1          | 28(1)                                                                                                                                            | F – 1                                    | San Salvador, El Salvador                                                                                                            | Finger                                                                                                                                                                          | Yes                          | Not mentioned                                                         | CD 34 – positive                                                                                                                                                                                                      | Not mentioned                                                    |
| <b>TOTAL:</b>                               | <b>326</b> | 10-19 (4)<br>20-29 (19)<br>30-39 (31)<br>40-49 (43)<br>50-59 (33)<br>60-69 (19)<br>70-79 (16)<br>80-89 (5)<br>90-99 (1)<br><br>Unspecified - 154 | <b>Male 198</b><br><br><b>Female 127</b> | <b>N. Amer. – 172</b><br><b>Europe – 131</b><br><b>Asia – 13</b><br><b>Africa – 4</b><br><b>Oceania – 3</b><br><b>S. America – 3</b> | <b>Finger 125</b><br><br><b>Toe 150</b><br><br><b>Hand 11</b><br><br><b>Foot 10</b><br><br><b>Heel 5</b><br><br><b>Leg 2</b><br><br><b>Thigh 1</b><br><br><b>Unspecified 22</b> | <b>Prior trauma 21 / 126</b> | <b>21/164 (all cases) = 13%</b><br><br><b>21/135 (f/up &gt;2 yrs)</b> | Vimentin: (Sensitivity - 100%)<br>- Positive – 82/82<br><br>CD 34: (Sensitivity – 95%)<br>- Positive – 161/169<br>- Negative – 8/162<br><br>CD 99: (Sensitivity – 78.87%)<br>- Positive – 59/74<br>- Negative – 15/71 | Excision – 252<br>Amputate – 8<br>Not mentioned – 5<br>Biopsy -2 |

## REFERENCES

1. Fetsch J F, Laskin W B, Miettinen M. Superficial acral fibromyxoma: a clinicopathologic and immunohistochemical analysis of 37 cases of a distinctive soft tissue tumor with a predilection for the fingers and toes. *Human Pathology*. 2001;32(07):704–714.
2. Kazakov DV, Mentzel T, Burg G, Kempf W. Superficial Acral Fibromyxoma: Report of Two Cases. *Dermatology*. 2002;205(3):285–8.
3. Meyerle J H, Keller R A, Krivda S J. Superficial acral fibromyxoma of the index finger. *Journal of American Academy of Dermatology*. 2004;50(01):134–136.
4. André J, Theunis A, Richert B, de Saint-Aubain N. Superficial acral fibromyxoma: clinical and pathological features. *American Journal Dermatopathology*. 2004;26(06):472–474.
5. Quaba O, Evans A, Al-Nafussi A A, Nassan A. Superficial acral fibromyxoma. *British Journal of Plastic Surgery*. 2005;58(04):561–564.
6. Abou-Nukta F, Fiedler P, Parkash V, Arons J. Superficial acral fibromyxoma of the distal phalanx of the thumb. *Journal of Hand Surgery (British and European Volume)*. 2006;31(06):619–620.
7. Tardío J C, Butrón M, Martín-Fragueiro L M. Superficial acral fibromyxoma: report of 4 cases with CD10 expression and lipomatous component, two previously underrecognized features. *American Journal of Dermatopathology*. 2008;30(05):431–435.
8. Misago N, Ohkawa T, Yanai T, Narisawa Y. Superficial acral fibromyxoma on the tip of the big toe: expression of CD10 and nestin. *Journal of the European Academy of Dermatology and Venereology*. 2008;22(02):255–257.
9. Prescott R J, Husain E A, Abdellaoui A et al. Superficial acral fibromyxoma: a clinicopathological study of new 41 cases from the U.K.: Should myxoma (NOS) and fibroma (NOS) continue as part of 21st-century reporting? *British Journal of Dermatology*. 2008;159(06):1315–1321.
10. Varikatt W, Soper J, Simmons G, Dave C, Munk J, Bonar F. Superficial acral fibromyxoma: a report of two cases with radiological findings. *Skeletal Radiology*. 2008;37(06):499–503.
11. Oteo-Alvaro A, Meizoso T, Scarpellini A, Ballestín C, Pérez-Espejo G. Superficial acral fibromyxoma of the toe, with erosion of the distal phalanx. A clinical report. *Archives Orthopaedic and Trauma Surgery*. 2008;128(03):271–274.

12. Al-Daraji W I, Miettinen M. Superficial acral fibromyxoma: a clinicopathological analysis of 32 tumors including 4 in the heel. *Journal of Cutaneous Pathology*. 2008;35(11):1020–1026.
13. Luzar B, Calonje E. Superficial acral fibromyxoma: clinicopathological study of 14 cases with emphasis on a cellular variant. *Histopathology*. 2009;54(03):375–377.
14. Wang Q F, Pu Y, Wu Y Y, Wang J. [Superficial acral fibromyxoma of finger: report of a case with review of literature]. *Zhonghua Bing Li Xue Za Zhi*. 2009;38(10):682–685.
15. Pasquinelli G, Foroni L, Papadopoulos F, Dicandia L, Bisceglia M. Superficial acral fibromyxoma: immunohistochemical and ultrastructural analysis of a case, with literature review. *Ultrastructural Pathology*. 2009;33(06):293–301.
16. Chattopadhyay M, Farrant P, Higgins E, Hay R, Calonje E. A nodular lesion of the toe. Superficial acral fibromyxoma (SAF). *Clinical and Experimental Dermatology*. 2010;35(07):807–809.
17. Cogrel O, Stanislas S, Coindre J M et al. [Superficial acral fibromyxoma: three cases]. *Annales de Dermatologie et de Venereologie*. 2010;137(12):789–793.
18. Goo J, Jung Y J, Kim J H, Lee S Y, Ahn S K. A case of recurrent superficial acral fibromyxoma. *Annals of Dermatology*. 2010;22(01):110–113.
19. Ashby-Richardson H, Rogers G S, Stadecker M J. Superficial acral fibromyxoma: an overview. *Archives of Pathology & Laboratory Medicine*. 2011;135(08):1064–1066.
20. Fanti P A, Dika E, Piraccini B M, Infusino S D, Baraldi C, Misciali C. Superficial acral fibromyxoma: a clinicopathological and immunohistochemical analysis of 12 cases of a distinctive soft tissue tumor with a predilection for the fingers and toes. *Giornale Italiano di Dermatologia e Venereologia*. 2011;146(04):283–287.
21. Messeguer F, Nagore E, Agustí-Mejias A, Traves V. Fibromixoma acral superficial, un tumor periungueal CD34 positivo. *Actas Dermosifiliograficas*. 2012;103(01):67–69.
22. Ben Brahim E, Bouabdellah M, Khanchel F, Jouini R, Abdelmoula S, Chadli-Debbiche A. Superficial acral fibromyxoma. *La Tunisie Medicale*. 2012;90(04):340–341.
23. Bindra J, Doherty M, Hunter J C. Superficial acral fibromyxoma. *Radiology Case Reports*. 2012;7(3):751.

24. Hollmann T J, Bovée J V, Fletcher C D. Digital fibromyxoma (superficial acral fibromyxoma): a detailed characterization of 124 cases. *American Journal of Surgical Pathology*. 2012;36(06):789–798.
25. Hwang S M, Cho K H, Lim K R, Jung Y H, Kim Song J. Superficial acral fibromyxoma on the second toe. *Archives of Plastic Surgery*. 2013;40(04):477–479.
26. Wei C, Fleegler E J. Superficial acral fibromyxoma of the thumb. *Eplasty*. 2013;13:ic13.
27. Kwok C, Merchant W J, Hussain W. Superficial acral fibromyxoma presenting as a haemorrhagic pigmented streak on the toenail. *Clinical and Experimental Dermatology*. 2013;38(05):553–554.
28. Chabbab F, Metz T, Saez Beltran L, Theunis A, Richert B. [Superficial acral fibromyxoma in a sub-matrical location: An unusual variant]. *Annales de Dermatologie et de Venereologie*. 2014;141(02):94–105.
29. Sinha A, Phukan J P, Bandyopadhyay G, Sengupta S, Saha R. Superficial Acral fibromyxoma: A rare tumor diagnosed by cytology. *Iranian Journal of Pathology*. 2013;8(1):59-63.
30. Park, S. W., Kim, J. H., Shin, H. T., Park, J. H., Lee, J. H., Lee, D. Y., Lee, J. H., & Yang, J. M. (2014). Superficial acral fibromyxoma on the palm. *Annals of Dermatology*, 26(1), 123–124. <https://doi.org/10.5021/ad.2014.26.1.123>
31. García A M, Mendonça F M, Cejudo M P, Martínez F M, Martín J J. Superficial Acral Fibromyxoma involving the nail's apparatus. Case report and literature review. *Anais Brasileiros de Dermatologia*. 2014;89(01):147–149.
32. Porto A C S, Nakandakari S, Soares C T. Superficial acral fibromyxoma in a female patient: a case report. *Surgical Cosmetic Dermatology* 2014;6(3):297–9.
33. Raghupathi D S, Krishnamurthy J, Kakoti L M. Cytological diagnosis of superficial acral fibromyxoma: A case report. *Journal of Cytology*. 2015;32(01):39–41.
34. Schwager Z A, Mannava K A, Mannava S, Telang G H, Robinson-Bostom L, Jellinek N J. Superficial acral fibromyxoma and other slow-growing tumors in acral areas. *Cutis*. 2015;95(02):E15–E19.
35. Sawaya J L, Khachemoune A. Superficial acral fibromyxoma. *International Journal of Dermatology*. 2015;54(05):499–508.

36. Carranza C, Molina-Ruiz A M, Pérez de la Fuente T, Kutzner H, Requena L, Santonja C. Subungual acral fibro myxoma involving the bone: a mimicker of malignancy. *American Journal of Dermatopathology*. 2015;37(07):555–559.
37. Hankinson A, Holmes T, Pierson J. Superficial acral fibromyxoma (Digital Fibromyxoma). *Dermatologic Surgery*. 2016;42(07):897-899
38. Ramya C, Nayak C, Tambe S. Superficial acral fibromyxoma. *Indian Journal of Dermatology*. 2016;61(04):457–459.
39. DeFroda S F, Starr A, Katarincic J A. Superficial acral fibromyxoma: A case report. *Journal of Orthopaedic*. 2016;14(01):23–25.
40. Grigore L E, Baican C I, Botar-Jid C et al. Clinico-pathologic, dermoscopic and ultrasound examination of a rare acral tumor involving the nail - case report and review of the literature. *Clujul Medical*. 2016;89(01):160–164.
41. Sundaramurthy N, Parthasarathy J, Mahipathy S R, Durairaj A R. Superficial acral fibromyxoma: a rare entity – A case report. *Journal of Clinical and Diagnostic Research*. 2016;10(09):PD03–PD05.
42. Agaimy A, Michal M, Giedl J, Hadravsky L, Michal M. Superficial acral fibromyxoma: clinicopathological, immunohistochemical, and molecular study of 11 cases highlighting frequent Rb1 loss/deletions. *Human Pathology*. 2017;60:192–198.
43. Gupta R, Malhotra A, Arora S, Bansal V. Superficial acral fibromyxoma: a rare and distinct clinicopathological entity: a case report and review of literature. *Human Pathology: case reports*. 2018;12:16-18
44. Pinheiro MMF, Schettini APM, Rodrigues CAC, Santos M. Superficial acral fibromyxoma. *Anais Brasileiros de Dermatologia*. 2017;92(4):589–590.
45. Robati RM, Dadkhahfar S, Rakhshan A. CD34 negative superficial acral fibromyxoma: a rare case report. *Indian Dermatology Online Journal*. 2017; 8(1): 45-47.
46. Hashimoto K, Nishimura S, Oka N, Tanaka H, Ryosuke Kakinoki, Akagi M. Aggressive superficial acral fibromyxoma of the great toe: A case report and mini-review of the literature. *Molecular and Clinical Oncology*. 2018 Jul 9.
47. Moulouguet I, Sophie G, Ines Z. Superficial Acral Fibromyxoma with cartilaginous metaplasia [Letters to the Editor]. *The American Journal of Dermatopathology*. 2019;41(4):316-317.
48. Sood N, Soin N. Superficial Acral Fibromyxoma: A cytohistopathological correlation in acral lesion. *Indian Journal of Pathology and Microbiology*. 2019;62(2):348-350.

49. Wagner K, Codrea V, Kelly B. A case of superficial acral fibromyxoma on a toe with prior history of trauma and surgery. *Journal of the American Academy of Dermatology*. 2019;81(4) Supplement 1:AB154
50. Crestani L, Fasciani I A, Kakizaki P, Valente N Y S. Care for diagnosis. Single-digit clubbing. *Anais Brasileiros de Dermatologia*. 2020;95(4):524-526
51. Ho, G, Kurek, C, Stewart, D, Martin, LK. An unusual growth in the nail matrix: a case of superficial acral fibromyxoma. *Skin Health Dis*. 2022; 2( 3):e121.
52. Debordes P-A, Hamoudi C, Weingertner N, Marco A D. Superficial acral fibromyxoma: a case of missed diagnosis. *Journal of Surgical Case Report*. 2023;2:1-4
53. Rodríguez S A M, Franco A M D. Dermatoscopy of subungual digital fibromyxoma (superficial acral fibromyxoma). *Journal of the American Academy of Dermatology Case reports*. 2023;33:109-111.
